# Supplementary material
Source: Copernicus journal article supplement (doi:10.5194/gmd-19-5155-2026)
Supplement: Supplementary file 1 [file gmd-19-5155-2026-supplement.pdf]

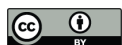

*Supplement of*

**SIM-HOM (version 1.0): a mechanistic module for the formation of highly oxygenated organic molecules from isoprene, monoterpene and sesquiterpene evaluated with ADCHAM (version 1.0)**

**Liwen Yang et al.**

*Correspondence to:* Wei Nie ([niewei@nju.edu.cn](mailto:niewei@nju.edu.cn))

The copyright of individual parts of the supplement might differ from the article licence.

## S1. Species naming convention

In Caltech isoprene mechanism, names of most species generally follow the stable precursor names (e.g., ISOP for isoprene, MVK for methyl vinyl ketone, MACR for methacrolein). Functional groups are added to the precursor name based on their position, with the carbon number of the attached functional group preceding it in ascending order (i.e. groups on C1 are listed before those on C2). Carbon numbers are those assigned to the parent compound (isoprene, MVK, or MACR). For stereoisomers, the designation “E”, “Z”, “c” (cis) or “t” (trans) is appended to the end of the name. Stabilized Criegee Intermediate (SCI) are marked with "ci" before the precursor name and “OO” following. Hot radicals are denoted by a lowercase "x" at the end of the name, while alkyl radicals are denoted by an "R" at the radical position. And MCM naming convention primarily composed of the total number of carbon atoms in the carbon backbone, unique numbers and specific functional groups attached to the backbone. The following summarizes the different names for the two mechanisms and elemental composition of substances in the isoprene oxidation system:

**Table S1.** Correspondence and elemental composition of species in Caltech and MCM

| NrC | NrH | NrN | NrO | Caltech name | MCM name  |
|-----|-----|-----|-----|--------------|-----------|
| 1   | 2   | 0   | 2   | HCOOH        | HCOOH     |
| 1   | 2   | 0   | 2   | ciCH2OO      | CH2OOE    |
| 1   | 3   | 0   | 2   | CH3OO        | CH3O2     |
| 2   | 2   | 0   | 2   | GLYX         | GLYOX     |
| 2   | 4   | 0   | 2   | GLYC         | HOCH2CHO  |
| 5   | 8   | 0   | 0   | ISOP         | C5H8      |
| 4   | 6   | 0   | 1   | MACR         | MACR      |
| 4   | 6   | 0   | 1   | MVK          | MVK       |
| 3   | 4   | 0   | 2   | MGLY         | MGLYOX    |
| 3   | 5   | 0   | 2   | CH3COOCH2    | CH3C2H2O2 |
| 2   | 2   | 0   | 3   | FAH          | CHOOCHO   |
| 3   | 6   | 0   | 2   | HAC          | ACETOL    |
| 2   | 3   | 0   | 3   | CH3CO3       | CH3CO3    |
| 2   | 4   | 0   | 3   | HPETHNL      | HCOCH2OOH |
| 5   | 6   | 0   | 1   | M3F          | M3F       |
| 5   | 9   | 0   | 1   | ISOP1OHc     | CISOPA    |
| 5   | 9   | 0   | 1   | ISOP4OHc     | CISOPC    |
| 5   | 9   | 0   | 1   | ISOP1OHt     | TISOPA    |
| 5   | 9   | 0   | 1   | ISOP4OHt     | TISOPC    |
| 4   | 6   | 0   | 2   | ciMVKOO      | MVKOOA    |
| 4   | 6   | 0   | 2   | ciMACROO     | MACROOA   |
| 4   | 6   | 0   | 2   | MACROO       | MACROO    |
| 4   | 6   | 0   | 2   | MVKOO        | MVKOO     |
| 4   | 6   | 0   | 2   | MACR1OH      | MACO2H    |
| 4   | 6   | 0   | 2   | MVKENOL      | HVMK      |
| 4   | 6   | 0   | 2   | MACRENOL     | HMAC      |
| 4   | 6   | 0   | 2   | HMACR        | HMACR     |

|   |    |   |   |               |            |
|---|----|---|---|---------------|------------|
| 3 | 4  | 0 | 3 | PYRAC         | CH3COCO2H  |
| 3 | 6  | 0 | 3 | HPAC          | HYPERACET  |
| 2 | 3  | 0 | 4 | HPA           | HOCH2CO3   |
| 2 | 4  | 0 | 4 | HPMF          | CHOOCH2OOH |
| 5 | 6  | 0 | 2 | ISOP1CO4CO    | C4MDIAL    |
| 4 | 4  | 0 | 3 | MVK3CO4CO     | CO23C3CHO  |
| 5 | 8  | 0 | 2 | ISOP1OH4CO    | HC4ACHO    |
| 5 | 8  | 0 | 2 | ISOP3CO4OH    | HCOC5      |
| 5 | 8  | 0 | 2 | ISOP1CO4OH    | HC4CCHO    |
| 4 | 5  | 0 | 3 | MACR2O3CO     | C3MDIALO   |
| 4 | 5  | 0 | 3 | MVK3O4CO      | C4CO2O     |
| 4 | 5  | 0 | 3 | MVK3CO4O      | BIACETO    |
| 4 | 5  | 0 | 3 | MACR1OO       | MACO3      |
| 5 | 9  | 0 | 2 | ISOP1OH2O     | ISOPBO     |
| 5 | 9  | 0 | 2 | ISOP1OH4Oc    | CISOPAO    |
| 5 | 9  | 0 | 2 | ISOP3O4OH     | ISOPDO     |
| 5 | 9  | 0 | 2 | ISOP1O4OH     | CISOPCO    |
| 5 | 9  | 0 | 2 | ISOP1OH4Ot    | ISOPAO     |
| 4 | 6  | 0 | 3 | HMML          | HMML       |
| 4 | 6  | 0 | 3 | MVK3OH4CO     | CO2H3CHO   |
| 4 | 6  | 0 | 3 | MACR1OOH      | MACO3H     |
| 4 | 6  | 0 | 3 | MVK3CO4OH     | BIACETOH   |
| 4 | 6  | 0 | 3 | MACR2OH3CO    | C3MDIALOH  |
| 5 | 10 | 0 | 2 | ISOP1OH2OH    | ISOPBOH    |
| 5 | 10 | 0 | 2 | ISOP1OH4OH    | ISOPAOH    |
| 5 | 10 | 0 | 2 | ISOP3OH4OH    | ISOPDOH    |
| 4 | 7  | 0 | 3 | MVK3OH4O      | HMVKAO     |
| 4 | 7  | 0 | 3 | MACR2O3OH     | MACRO      |
| 4 | 7  | 0 | 3 | MACR2OH3O     | MACROHO    |
| 4 | 7  | 0 | 3 | MVK3O4OH      | HMVKBO     |
| 4 | 8  | 0 | 3 | MACR2OH3OH    | MACROH     |
| 4 | 8  | 0 | 3 | MVK3OH4OH     | HO12CO3C4  |
| 5 | 5  | 0 | 3 | ISOP1CO4O4CO  | C3MCODBCO2 |
| 5 | 5  | 0 | 3 | ISOP1CO1O4CO  | MC3CODBCO2 |
| 5 | 6  | 0 | 3 | ISOP1CO1OH4CO | MC3ODBCO2H |
| 5 | 8  | 0 | 3 | ISOP1CO23O4OH | IEB1CHO    |
| 5 | 8  | 0 | 3 | ISOP1OH3CO4OH | C524CO     |
| 5 | 8  | 0 | 3 | ISOP12O3OH4CO | IECCHO     |
| 5 | 8  | 0 | 3 | ISOP1OH23O4CO | IEB4CHO    |
| 5 | 8  | 0 | 3 | ISOP1CO1OH4OH | HC4CCO2H   |
| 5 | 8  | 0 | 3 | ISOP1OOH4COc  | C5HPALD2   |
| 5 | 8  | 0 | 3 | ISOP1CO4OOHc  | C5HPALD1   |
| 5 | 8  | 0 | 3 | ISOP1OH4CO4OH | HC4ACO2H   |

|   |    |   |   |                   |            |
|---|----|---|---|-------------------|------------|
| 5 | 8  | 0 | 3 | ISOP1CO2OH34O     | IEACHO     |
| 4 | 5  | 0 | 4 | MVK3CO4OO         | BIACETO2   |
| 4 | 5  | 0 | 4 | MACR2OO3CO        | C3MDIALO2  |
| 5 | 9  | 0 | 3 | ISOP1OH3O4OH      | C524O      |
| 5 | 9  | 0 | 3 | ISOP1OH2OO        | ISOPBO2    |
| 5 | 9  | 0 | 3 | ISOP1OH4OOc       | CISOPAO2   |
| 5 | 9  | 0 | 3 | ISOP3OO4OH        | ISOPDO2    |
| 5 | 9  | 0 | 3 | ISOP1OO4OHc       | CISOPCO2   |
| 5 | 9  | 0 | 3 | ISOP1OH4OOt       | ISOPAO2    |
| 5 | 9  | 0 | 3 | ISOP1OO4OHt       | ISOPCO2    |
| 4 | 6  | 0 | 4 | MVK3CO4OOH        | BIACETOOH  |
| 4 | 6  | 0 | 4 | MACR2OOH3CO       | C3MDIALOOH |
| 4 | 6  | 0 | 4 | MVK3OOH4CO        | C4CO2OOH   |
| 5 | 10 | 0 | 3 | ISOP1OH2OOH       | ISOPBOOH   |
| 5 | 10 | 0 | 3 | ISOP1OH4OOHt/c    | ISOPAOOH   |
| 5 | 10 | 0 | 3 | ISOP3OOH4OH       | ISOPDOOH   |
| 5 | 10 | 0 | 3 | ISOP1OOH4OHt/c    | ISOPCOOH   |
| 5 | 10 | 0 | 3 | ISOP12O3OH4OH     | IEPOXC     |
| 5 | 10 | 0 | 3 | ISOP1OH2OH34O     | IEPOXA     |
| 5 | 10 | 0 | 3 | ISOP1OH3OH4OH     | C524OH     |
| 5 | 10 | 0 | 3 | ISOP1OH23O4OHc(t) | IEPOXB     |
| 4 | 7  | 0 | 4 | MACR2OO3OH        | MACRO2     |
| 4 | 7  | 0 | 4 | MACR2OH3OO        | MACROHO2   |
| 4 | 7  | 0 | 4 | MVK3OH4OO         | HMVKAO2    |
| 4 | 7  | 0 | 4 | MVK3OO4OH         | HMVKBO2    |
| 4 | 8  | 0 | 4 | MACR2OOH3OH       | MACROOH    |
| 4 | 8  | 0 | 4 | MACR2OH3OOH       | MACROHOOH  |
| 4 | 8  | 0 | 4 | MVK3OH4OOH        | HMVKAOOH   |
| 4 | 8  | 0 | 4 | MVK3OOH4OH        | HMVKBOOH   |
| 5 | 5  | 0 | 4 | ISOP1CO4OO4CO     | C3MCODBC03 |
| 5 | 5  | 0 | 4 | ISOP1CO1OO4CO     | MC3CODBC03 |
| 5 | 6  | 0 | 4 | ISOP1CO4CO4OOH    | C5PACALD2  |
| 5 | 6  | 0 | 4 | ISOP1CO1OOH4CO    | C5PACALD1  |
| 5 | 7  | 0 | 4 | ISOP1CO1OO4OH     | HC4CCO3    |
| 5 | 7  | 0 | 4 | ISOP1OH4CO4OO     | HC4ACO3    |
| 5 | 7  | 0 | 4 | ISOP1CO2O3OH4CO   | C4M2ALOH0  |
| 5 | 8  | 0 | 4 | ISOP1CO2OH3OH4CO  | C4M2AL2OH  |
| 5 | 8  | 0 | 4 | ISOP1CO1OOH4OH    | HC4CCO3H   |
| 5 | 8  | 0 | 4 | ISOP1OH4CO4OOH    | HC4ACO3H   |
| 4 | 5  | 0 | 5 | MACR2OH3CO3OO     | CHOMOHCO3  |
| 4 | 5  | 0 | 5 | MVK3OH4CO4OO      | CO2H3CO3   |
| 5 | 9  | 0 | 4 | ISOP1CO2OH3O4OH   | C57AO      |
| 5 | 9  | 0 | 4 | ISOP1OH2O3CO4OH   | C59O       |

|   |    |   |   |                       |            |
|---|----|---|---|-----------------------|------------|
| 5 | 9  | 0 | 4 | ISOP1CO2O3OH4OH       | C57O       |
| 5 | 9  | 0 | 4 | ISOP1OH2O3OH4CO       | C58O       |
| 5 | 9  | 0 | 4 | ISOP1OH2OH3O4CO       | C58AO      |
| 5 | 9  | 0 | 4 | ISOP1OH3OO4OH         | C524O2     |
| 4 | 6  | 0 | 5 | MVK3OH4CO4OOH         | CO2H3CO3H  |
| 4 | 6  | 0 | 5 | MACR2OH3CO3OOH        | CHOMOHCO3H |
| 5 | 10 | 0 | 4 | ISOP1OH3OOH4OH        | C524OOH    |
| 4 | 8  | 0 | 5 | MVK3OOH4OOH           | DHPMEK     |
| 4 | 8  | 0 | 5 | MACR2OOH3OOH          | DHPMPAL    |
| 5 | 7  | 0 | 5 | ISOP12O3OH4CO4OO      | IECCO3     |
| 5 | 7  | 0 | 5 | ISOP1CO1OO2OH34O      | IEACO3     |
| 5 | 7  | 0 | 5 | ISOP1CO2OO3OH4CO      | C4M2ALOH02 |
| 5 | 8  | 0 | 5 | ISOP1CO1OOH2OH34O     | IEACO3H    |
| 5 | 8  | 0 | 5 | ISOP12O3OH4CO4OOH     | IECCO3H    |
| 5 | 8  | 0 | 5 | ISOP1CO2OOH3CO4OH     | IEC2OOH    |
| 5 | 8  | 0 | 5 | ISOP1CO2OOH3OH4CO     | C4MALOHOOH |
| 5 | 9  | 0 | 5 | ISOP1CO2O3OOH4OH      | C526O      |
| 5 | 9  | 0 | 5 | ISOP1OH2OO3CO4OH      | C59O2      |
| 5 | 9  | 0 | 5 | ISOP1OH2O2COH3CO4OH   | C525O      |
| 5 | 9  | 0 | 5 | ISOP1OH2OOH3O4CO      | C527O      |
| 5 | 9  | 0 | 5 | ISOP1OOH2O3OH4CO      | HPC52O     |
| 5 | 10 | 0 | 5 | ISOP1OH2OOH3OH4CO     | C58OOH     |
| 5 | 10 | 0 | 5 | ISOP1OH2OOH3CO4OH     | C59OOH     |
| 5 | 7  | 0 | 6 | ISOP1CO2O3OH4CO4OOH   | C535O      |
| 5 | 7  | 0 | 6 | ISOP1CO1OOH2O3OH4CO   | C534O      |
| 5 | 9  | 0 | 6 | ISOP1CO2O3OOH4OOH     | C536O      |
| 5 | 9  | 0 | 6 | ISOP1OOH2OOH3O4CO     | C537O      |
| 5 | 9  | 0 | 6 | ISOP1CO2OO3OOH4OH     | C526O2     |
| 5 | 9  | 0 | 6 | ISOP1OH2OOH3OO4CO     | C527O2     |
| 5 | 9  | 0 | 6 | ISOP1OH2OO2COH3CO4OH  | C525O2     |
| 5 | 9  | 0 | 6 | ISOP1OOH2OO3OH4CO     | HPC52O2    |
| 5 | 10 | 0 | 6 | ISOP1OH2OOH2COH3CO4OH | C525OOH    |
| 5 | 10 | 0 | 6 | ISOP1OH2OOH3OOH4CO    | C527OOH    |
| 5 | 10 | 0 | 6 | ISOP1OOH2OOH3OH4CO    | HPC52OOH   |
| 5 | 10 | 0 | 6 | ISOP1CO2OOH3OOH4OH    | C526OOH    |
| 5 | 7  | 0 | 7 | ISOP1CO2OO3OH4CO4OOH  | C535O2     |
| 5 | 7  | 0 | 7 | ISOP1CO1OOH2OO3OH4CO  | C534O2     |
| 5 | 8  | 0 | 7 | ISOP1CO2OOH3OH4CO4OOH | C535OOH    |
| 5 | 8  | 0 | 7 | ISOP1CO1OOH2OOH3OH4CO | C534OOH    |
| 5 | 9  | 0 | 7 | ISOP1OOH2OOH3OO4CO    | C537O2     |
| 5 | 9  | 0 | 7 | ISOP1CO2OO3OOH4OOH    | C536O2     |
| 5 | 10 | 0 | 7 | ISOP1CO2OOH3OOH4OOH   | C536OOH    |
| 5 | 10 | 0 | 7 | ISOP1OOH2OOH3OOH4CO   | C537OOH    |

|   |    |   |   |                        |           |
|---|----|---|---|------------------------|-----------|
| 5 | 9  | 0 | 8 | ISOP1OOH2OOH3OH4CO4OO  | HPC52CO3  |
| 5 | 10 | 0 | 8 | ISOP1OOH2OOH3OH4CO4OOH | HPC52CO3H |

## S2. Chamber runs

The model simulations were constrained by the CLOUD chamber conditions. Specifically, the initial mixing ratios of VOCs and O<sub>3</sub>, together with the chamber irradiation settings, were prescribed according to the experimental setup (see Table 1). These inputs provide the precursors and oxidants required for HOM formation.

The simulations were performed with the Aerosol Dynamics gas- and particle-phase chemistry model for laboratory CHAMber studies (ADCHAM)(Roldin et al., 2014). In this framework, the default chemical module was replaced by a detailed gas-phase kinetic mechanism generated by the Kinetic PreProcessor (KPP)(Damian et al., 2002). This mechanism, referred to as SIM-HOM (Sesquiterpene, Isoprene and Monoterpene-derived HOM mechanism), integrates the peroxy radical autoxidation mechanism (PRAM)(Roldin et al., 2019), the Master Chemical Mechanism version 3.3.1 (MCMv3.3.1), the Caltech isoprene mechanism(Wennberg et al., 2018), and additional reactions relevant for HOM formation. SIM-HOM explicitly represents peroxy radical (RO<sub>2</sub>) chemistry and the production of highly oxygenated molecules (HOMs). A complete list of reactions is provided in the Code and data Availability section.

The removal of HOM was mainly through wall loss, which were parameterized by assuming irreversible uptake due to the extremely low vapor pressures of HOMs. Diffusion coefficients (D<sub>i</sub>) were estimated as:

$$D_i(\text{cm}^2\text{s}^{-1}) = 0.31 \cdot M_i^{-1/3} \quad (1)$$

where M<sub>i</sub> (g mol<sup>-1</sup>) is the mass of the molecule. The wall loss rate inside the chamber at each temperature is determined from the following expression:

$$k_{\text{wall}}(T) = C_{\text{wall}}(T) \cdot \sqrt{D_i} \quad (2)$$

where C<sub>wall</sub> is an empirical parameter and set to 0.0075 cm<sup>-1</sup> s<sup>-0.5</sup> at 5 °C in this study.

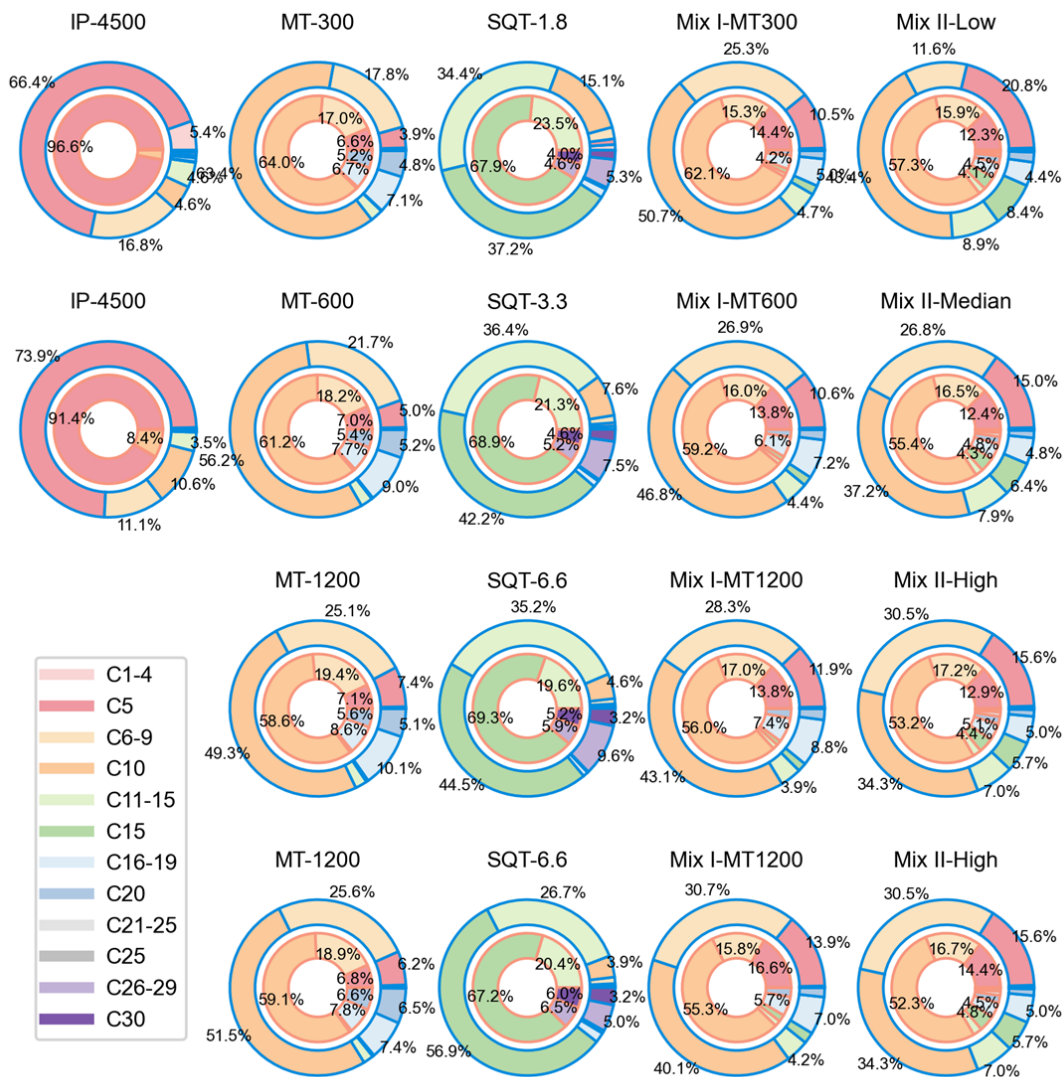

**Figure S1.** Carbon distributions in each system under all different experimental conditions. Blue and outer circles indicate observed values, pink and inner circles indicate simulated values. From left to right, they represent pure isoprene, monoterpene, and sesquiterpene systems, the mixed system of isoprene, monoterpene, and the mixed system of the three VOCs. The specific experimental conditions are shown in Table 1.

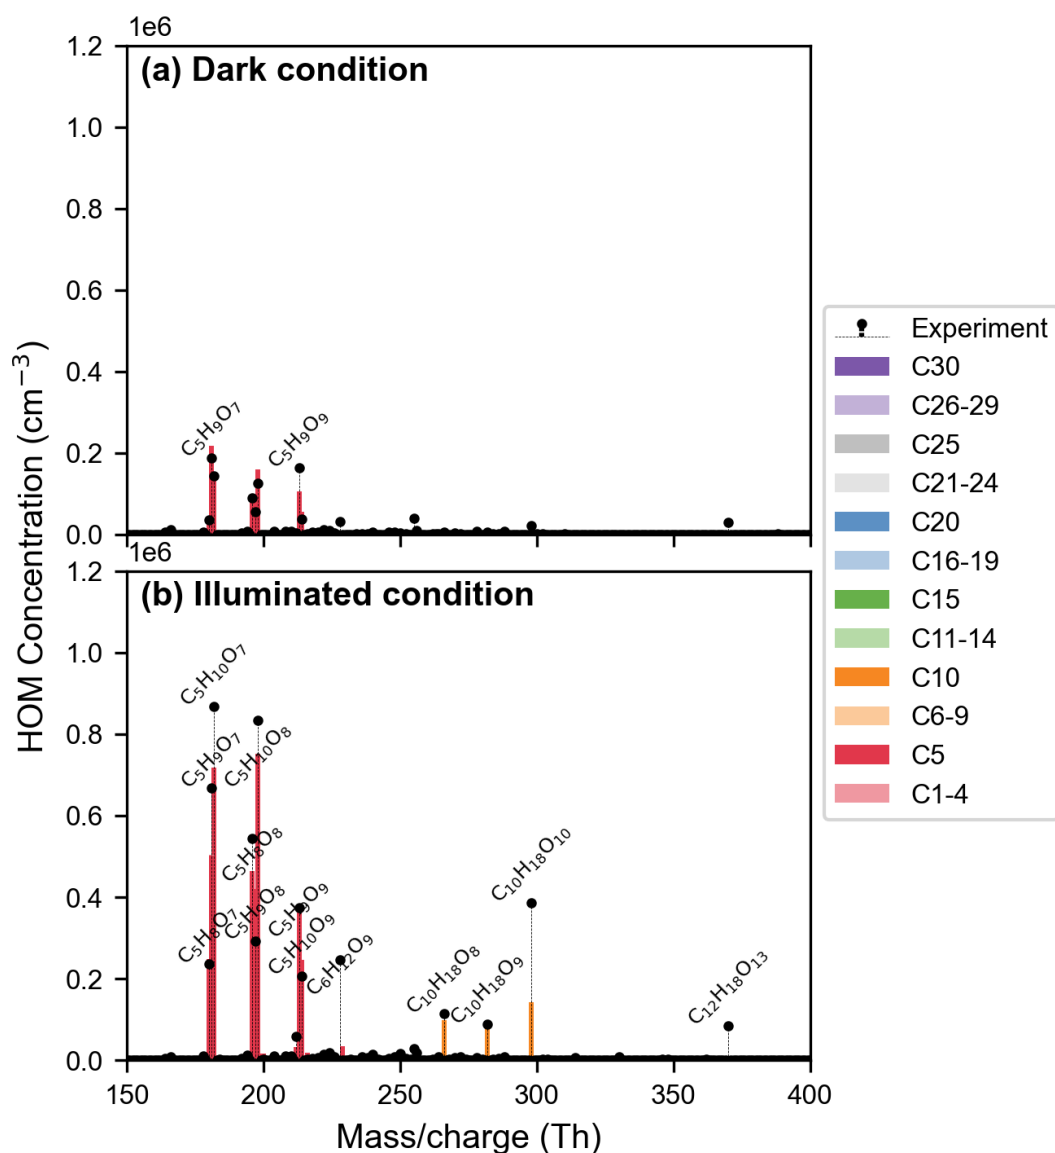

**Figure S2.** Comparisons between modeled and observed spectrum in isoprene oxidation experiment with around 4.5 ppb isoprene in (a) dark condition and (d) UV excimer laser (UVX) on. Mass/charge ratio is plotted in units of thomsons (Th) and it should be noted that the nitrate reagent ions has been removed from mass.

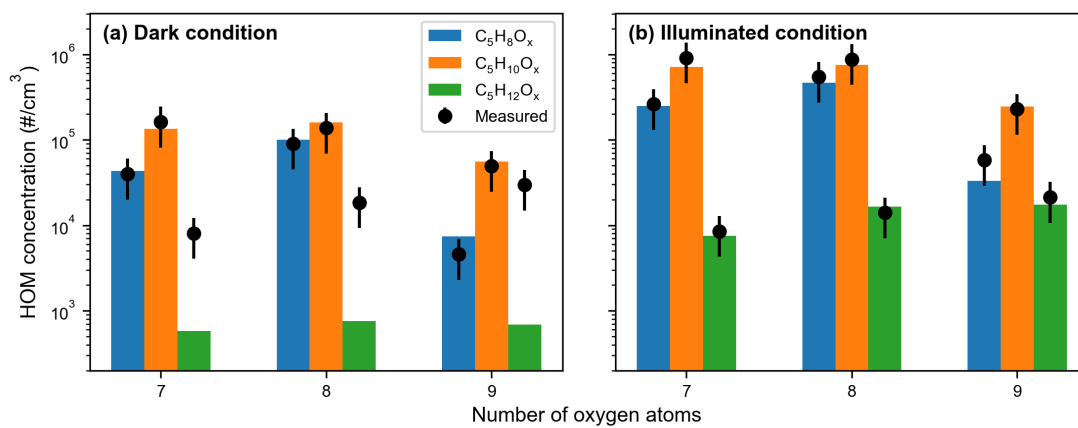

**Figure S3.** Comparison of simulated and observed representative oxidation products with 5 carbons for isoprene oxidation experiments. Blue, orange, and green colors indicate oxidation products with molecular formula C<sub>5</sub>H<sub>8</sub>O<sub>x</sub>, C<sub>5</sub>H<sub>10</sub>O<sub>x</sub> and C<sub>5</sub>H<sub>12</sub>O<sub>x</sub>, respectively. The measurement error of the HOM concentration varies within 50 % in experiments.

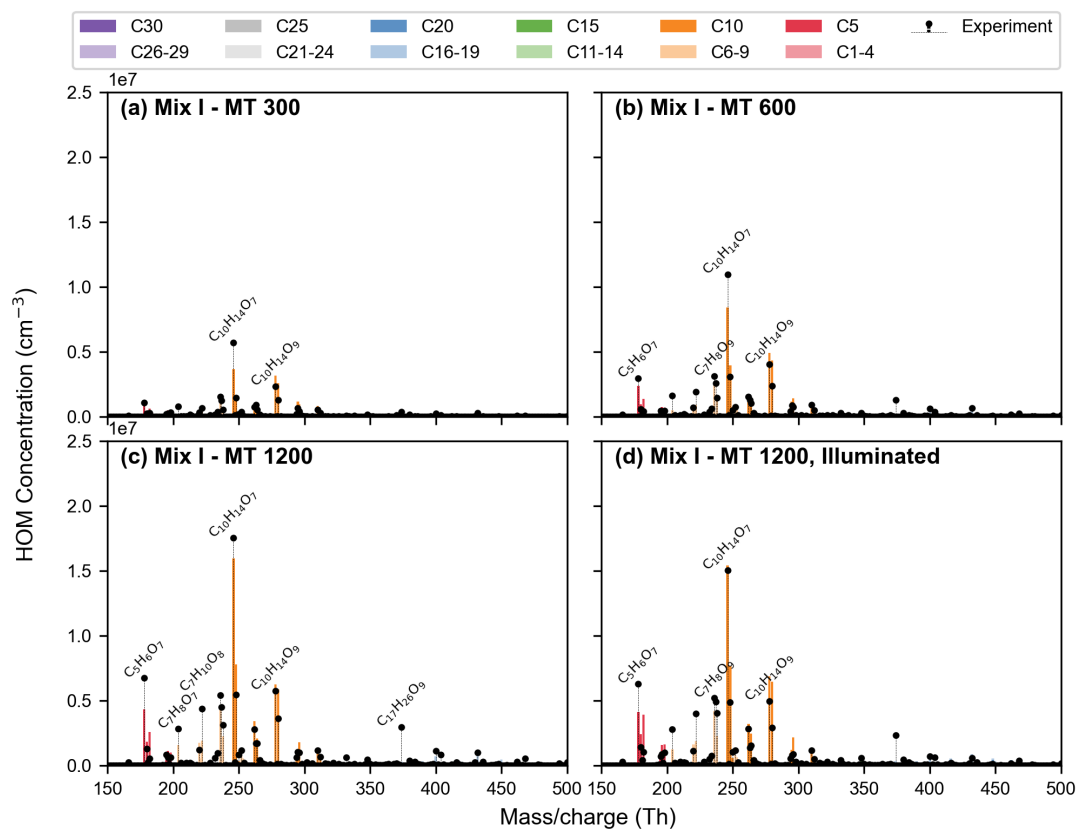

**Figure S4.** Comparisons between modeled and observed spectrum in mix system I of isoprene and monoterpene. These experiments are conducted under (a) 3962 ppt isoprene and 317 ppt monoterpene, (b) 3780 ppt isoprene and 618 ppt monoterpene, (c) 3588 ppt isoprene and 1116 ppt monoterpene and (d) 3396 ppt isoprene and 1096 ppt monoterpene in (a-c) dark condition and (d) Hamamatsu UV lamps (UVH) and UV excimer lasers (UVX) on. Mass/charge ratio is plotted in units of thomsons (Th) and it should be noted that the nitrate reagent ions has been removed from mass.

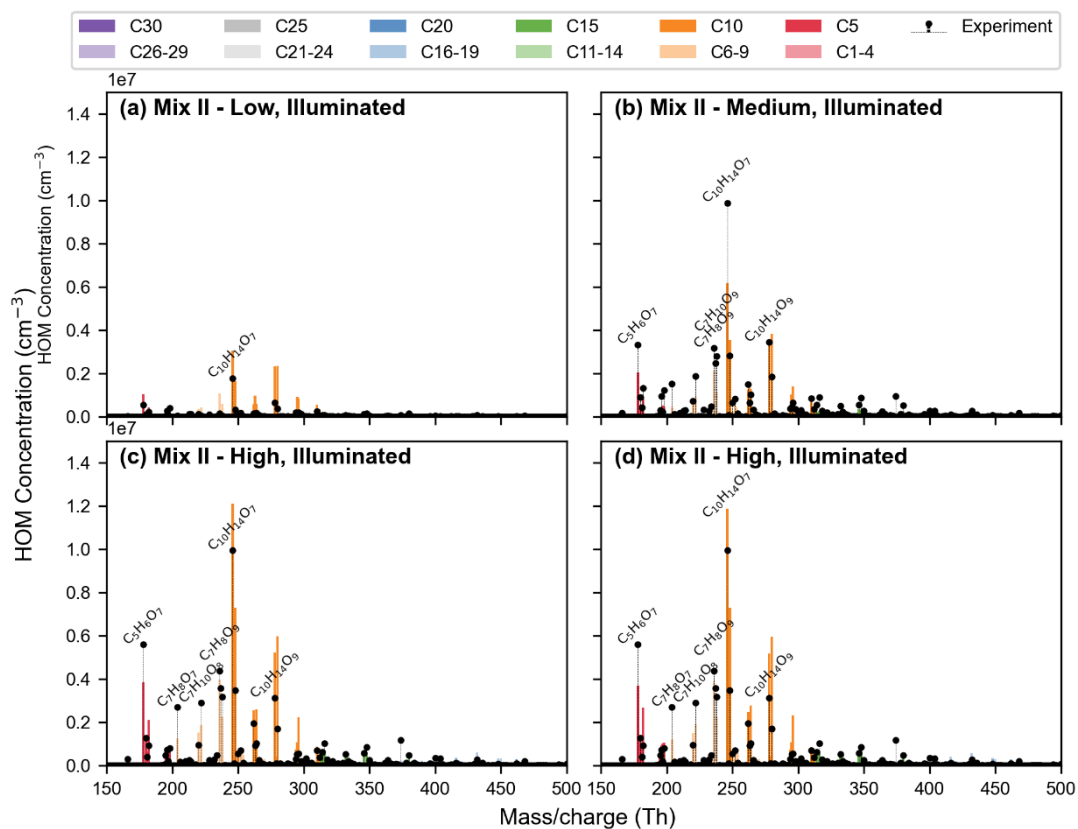

**Figure S5.** Comparisons between modeled and observed spectrum in mix system II of isoprene, monoterpene and sesquiterpene. These experiments are conducted under (a) 1471 ppt isoprene, 303 ppt monoterpene and 3 ppt sesquiterpene, (b) 2695 ppt isoprene, 578 ppt monoterpene and 7.1 ppt sesquiterpene, (c) 5749 ppt isoprene, 1168 ppt monoterpene and 15.8 ppt sesquiterpene and (d) 4578 ppt isoprene, 974 ppt monoterpene and 15.8 ppt sesquiterpene in (a-d) UVH on and (d) UVX on. Mass/charge ratio is plotted in units of thomsons (Th) and it should be noted that the nitrate reagent ions has been removed from mass.

## Reference

- Damian, V., Sandu, A., Damian, M., Potra, F., and Carmichael, G. R.: The kinetic preprocessor KPP - a software environment for solving chemical kinetics, *Comput. Chem. Eng.*, 26, 1567-1579, 10.1016/s0098-1354(02)00128-x, 2002.
- Roldin, P., Eriksson, A. C., Nordin, E. Z., Hermansson, E., Mogensen, D., Rusanen, A., Boy, M., Swietlicki, E., Svenningsson, B., Zelenyuk, A., and Pagels, J.: Modelling non-equilibrium secondary organic aerosol formation and evaporation with the aerosol dynamics, gas- and particle-phase chemistry kinetic multilayer model ADCHAM, *Atmospheric Chemistry and Physics*, 14, 7953-7993, 10.5194/acp-14-7953-2014, 2014.
- Roldin, P., Ehn, M., Kurtén, T., Olenius, T., Rissanen, M. P., Sarnela, N., Elm, J., Rantala, P., Hao, L., Hyttinen, N., Heikkinen, L., Worsnop, D. R., Pichelstorfer, L., Xavier, C., Clusius, P., Öström, E., Petäjä, T., Kulmala, M., Vehkamäki, H., Virtanen, A., Riipinen, I., and Boy, M.: The role of highly oxygenated organic molecules in the Boreal aerosol-cloud-climate system, *Nat. Commun.*, 10, 4370, 10.1038/s41467-019-12338-8, 2019.
- Wennberg, P. O., Bates, K. H., Crounse, J. D., Dodson, L. G., McVay, R. C., Mertens, L. A., Nguyen, T. B., Praske, E., Schwantes, R. H., Smarte, M. D., St Clair, J. M., Teng, A. P., Zhang, X., and Seinfeld, J. H.: Gas-Phase Reactions of Isoprene and Its Major Oxidation Products, *Chem. Rev.*, 118, 3337-3390, 10.1021/acs.chemrev.7b00439, 2018.
